# Supplementary material for: An N-sulfanylethylanilide-based traceable linker for enrichment and selective labelling of target proteins
Source: Royal Society of Chemistry journal article supplement (doi:10.1039/c6cc01229a), 2016-01-01
Supplement: c6cc01229a1.pdf [file c6cc01229a1.pdf]

Electronic Supplementary Information

***N*-Sulfanylethylanilide-based traceable linker for enrichment and selective labelling of target proteins**

Takuya Morisaki,<sup>a</sup> Masaya Denda,<sup>a</sup> Jun Yamamoto,<sup>a</sup> Daisuke Tsuji,<sup>b</sup> Tsubasa Inokuma,<sup>a</sup> Kohji Itoh,<sup>b</sup> Akira Shigenaga,<sup>\*ac</sup> and Akira Otake<sup>\*a</sup>

- a) Institute of Biomedical Sciences and Graduate School of Pharmaceutical Sciences, Tokushima University, Shomachi, Tokushima 770-8505, Japan
- b) Institute for Medicinal Research, Graduate School of Pharmaceutical Sciences, Tokushima University, Shomachi, Tokushima 770-8505, Japan
- c) PRESTO, Japan Science and Technology Agency (JST), 4-1-8 Honcho, Kawaguchi, Saitama 332-0012, Japan

E-mail:

shigenaga.akira@tokushima-u.ac.jp (A. Shigenaga)

aotaka@ph.tokushima-u.ac.jp (A. Otake)

## Table of Contents

|                                                                                                                                          |     |
|------------------------------------------------------------------------------------------------------------------------------------------|-----|
| Supplemental Schemes S1-S3 and Figures S1-S7.....                                                                                        | S2  |
| General methods.....                                                                                                                     | S6  |
| Synthesis of SEALide-based traceable linker <b>6</b> as shown in Scheme S1.....                                                          | S6  |
| Preparation of traceable linkers <b>S8</b> and <b>S9</b> and negative control linker <b>7</b> .....                                      | S7  |
| Click chemistry of traceable linker <b>6</b> with alkynylated small molecule <b>S5</b><br>followed by linker cleavage with cysteine..... | S8  |
| Preparation of alkynylated BSA.....                                                                                                      | S9  |
| SDS-PAGE Conditions.....                                                                                                                 | S9  |
| Introduction of traceable linker <b>6</b> , <b>S8</b> , <b>S9</b> or negative control <b>7</b><br>onto alkynylated BSA.....              | S9  |
| Adsorption on streptavidin beads followed by elution of BSA conjugate.....                                                               | S9  |
| Enrichment and selective labelling of BSA in protein mixture.....                                                                        | S10 |
| References.....                                                                                                                          | S11 |

## Abbreviations

|      |                                              |
|------|----------------------------------------------|
| MPAA | 4-mercaptophenylacetic acid                  |
| TCEP | tris(2-carboxyethyl)-phosphine hydrochloride |

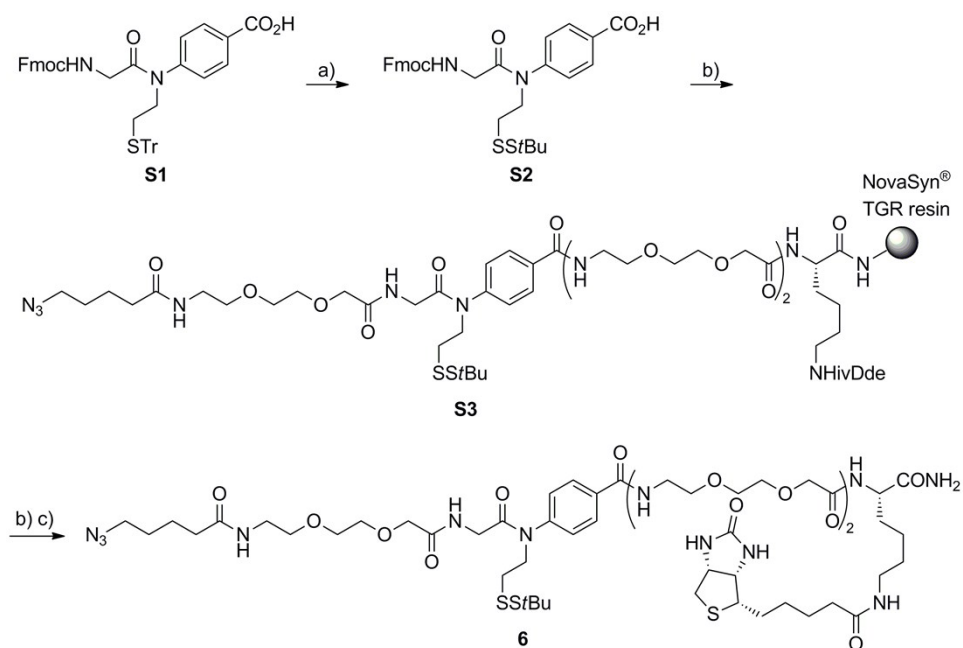

**Scheme S1** Reagents and conditions: a) *t*BuSH, I<sub>2</sub>, CH<sub>2</sub>Cl<sub>2</sub>, 79%; b) Fmoc SPPS; c) TFA/triethylsilane/H<sub>2</sub>O = 95/2.5/2.5 (v/v).

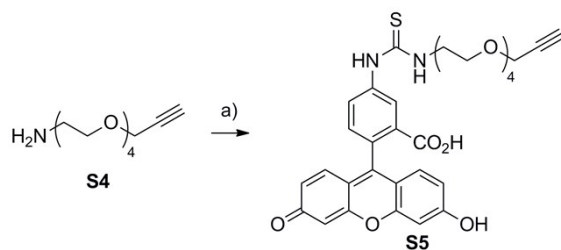

**Scheme S2** Reagents and conditions: a) fluorescein 5-isothiocyanate, triethylamine, THF, EtOH, 93%.

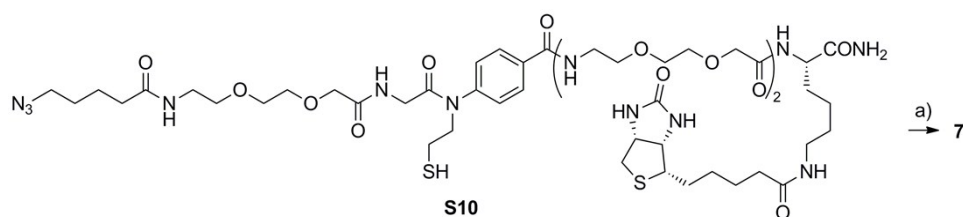

**Scheme S3** Reagents and conditions: a) methyl iodide, DIPEA, DMF, 19%.

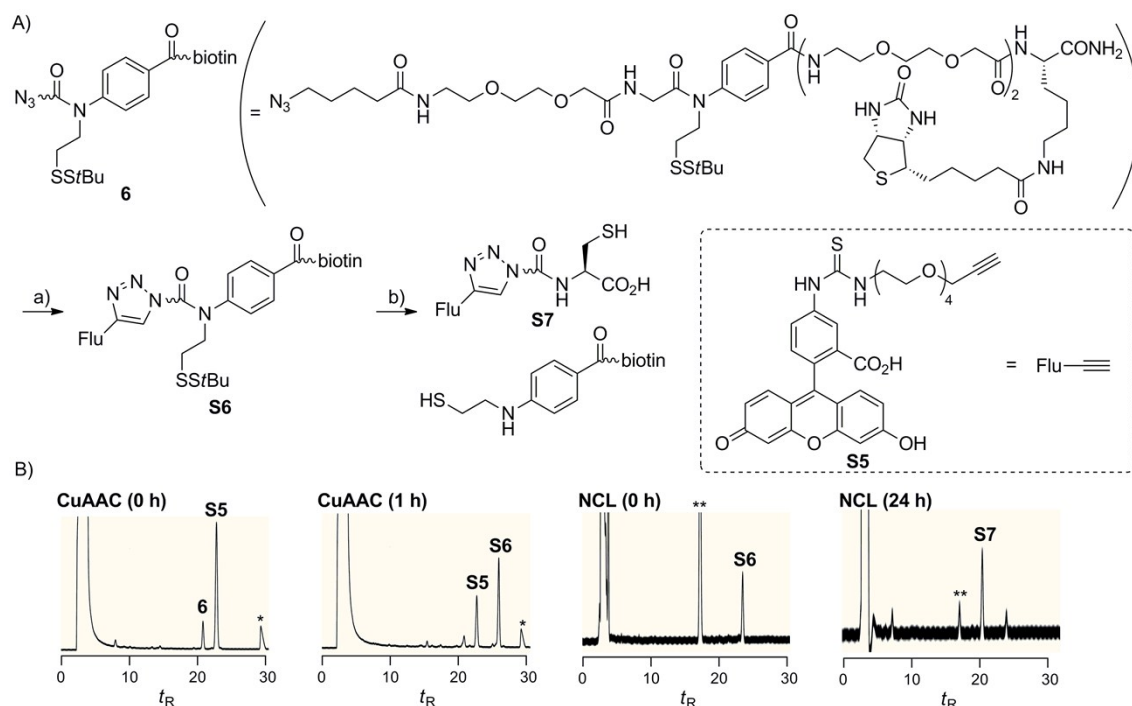

**Fig. S1** CuAAC of the traceable linker **6** followed by NCL. A) Reagents and conditions: **S5**, CuSO<sub>4</sub>, Na ascorbate, TBTA, PBS, DMF (\*Non-peptidic peak derived from reagents); b) MPAA, TCEP, Na phosphate buffer, NP40, 37 °C (\*\*MPAA). B) Reaction profiles of the CuAAC and NCL. HPLC conditions for CuAAC: 0.1% (v/v) TFA in acetonitrile/0.1% (v/v) TFA aq., 30 to 40% over 30 min, detection by UV absorption (220 nm); HPLC conditions for NCL: 0.1% (v/v) TFA in acetonitrile/0.1% (v/v) TFA aq., 25 to 35% over 30 min, detection by UV absorption (220 nm).

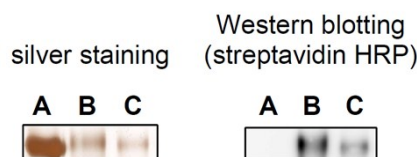

**Fig. S2** CuAAC of traceable linker **6** and alkynylated BSA. **A**: before CuAAC; **B**: after CuAAC with traceable linker **6**; **C**: after CuAAC with negative control **7**. Reagents and conditions: 3.2 μM alkynylated BSA, 100 μM traceable linker **6**, 1.0 mM CuSO<sub>4</sub>, 1.0 mM Na ascorbate, 1% (w/v) SDS, 100 μM TBTA, PBS, 1 h.

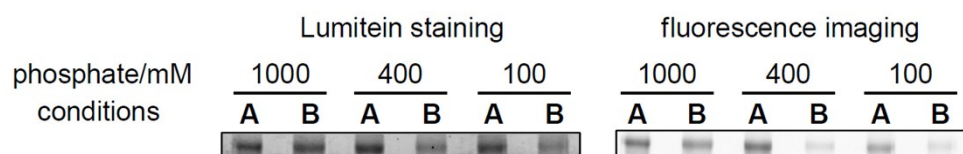

**Fig. S3** SDS-PAGE of the BSA-traceable linker **6** conjugate eluted from the streptavidin beads. Elution conditions **A**: 100 μM **8**, 50 mM MPAA, 40 mM TCEP, 0.1% SDS, Na phosphate buffer (concentration of the phosphate: 1000, 400 or 100 mM), pH 7.4, 37 °C, 24 h; elution conditions **B** for the elution of the proteins remaining on the beads after the application of conditions **A**: sample buffer, 100 °C, 5 min. Lumitein staining allowed for the visualization of all proteins as similar to silver staining. Fluorescence imaging, λ<sub>ex</sub> = 460 nm, λ<sub>em</sub> > 515 nm.

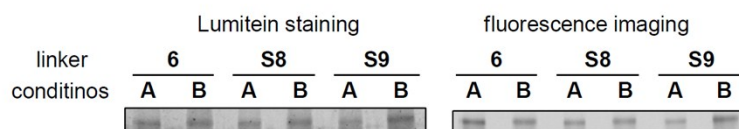

| linker<br>conditions | Lumitein staining                                                                   |   |   |   | fluorescence imaging                                                                 |   |   |   |
|----------------------|-------------------------------------------------------------------------------------|---|---|---|--------------------------------------------------------------------------------------|---|---|---|
|                      | 6                                                                                   |   | 7 |   | 6                                                                                    |   | 7 |   |
|                      | A                                                                                   | B | A | B | A                                                                                    | B | A | B |
|                      |  |   |   |   |  |   |   |   |

Chromatogram of the sample showing a major peak at 24.3 minutes labeled S7. The x-axis is retention time  $t_R$  in minutes (0 to 30) and the y-axis is intensity (0.00 to 65.00).

S4

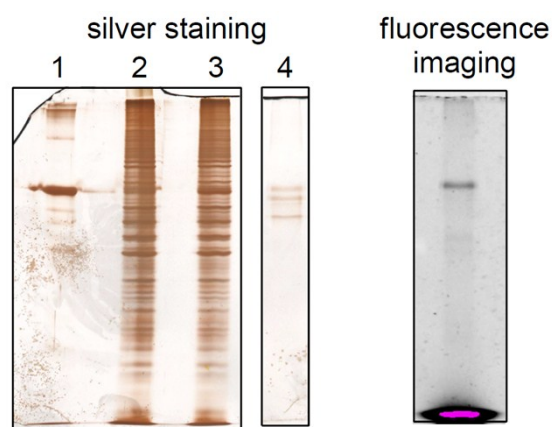

**Fig. S7** Enrichment and selective labelling of the alkynylated BSA in HCT116 cell lysate using traceable linker **6**. Details of the conditions are shown in the experimental section. Silver staining: lane 1: alkynylated BSA; Lane 2: lysate of HCT116 cells; Lane 3: a mixture of the alkynylated BSA and HCT116 cell lysate; Lane 4: eluted proteins after the CuAAC reaction of the mixture with **6**, adsorption of the biotinylated material onto streptavidin beads and the treatment of the beads with cysteine-fluorescein conjugate **8** in the presence of phosphate (elution by linker cleavage using elution conditions **A** shown in Figure S4); Fluorescence imaging: the sample applied to lane 4 was analyzed ( $\lambda_{\text{ex}} = 460 \text{ nm}$ ,  $\lambda_{\text{em}} > 515 \text{ nm}$ ).

## General Methods

All reactions of small molecules were carried out under a positive pressure of argon. Column chromatography of the small molecules was performed using Silica Gel 60 N (spherical, neutral, Kanto Chemical Co., Inc.). Mass spectra were recorded on a Waters MICROMASS<sup>®</sup> LCT PREMIER<sup>™</sup> (ESI-TOF) or a Bruker Esquire2000T (ESI-Ion Trap). NMR spectra were recorded using a Bruker AV400N at 400 MHz frequency for <sup>1</sup>H, and JEOL JNM-AL300 at 75 MHz frequency for <sup>13</sup>C. Optical rotations were measured using a JASCO P-2200 polarimeter (concentration in g/100 mL). For HPLC separations, a Cosmosil 5C<sub>18</sub>-AR-II analytical column (Nacalai Tesque, 4.6 × 250 mm, flow rate 1.0 mL/min), a Cosmosil 5C<sub>18</sub>-AR-II semi-preparative column (Nacalai Tesque, 10 × 250 mm, flow rate 3.0 mL/min) or a Cosmosil 5C<sub>18</sub>-AR-II preparative column (Nacalai Tesque, 20 × 250 mm, flow rate 10.0 mL/min) was employed, and eluting products were detected by UV absorption (220 nm) or fluorescence ( $\lambda_{\text{ex}}$  = 495 nm,  $\lambda_{\text{em}}$  = 520 nm). A solvent system consisting of 0.1% (v/v) TFA in H<sub>2</sub>O and 0.1% TFA (v/v) in MeCN using linear gradient over 30 min was employed for HPLC elution. ECL signals from the western blot analysis and fluorescence were detected using a LAS-4000mini (Fujifilm). Composition of an SDS-PAGE sample loading buffer is as follow: 50 mM Tris-HCl, 2.0% (v/v) SDS, 6.0% (v/v) 2-mercaptoethanol, 10% (v/v) glycerol and 0.050% (w/v) bromophenol blue in H<sub>2</sub>O.

## Synthesis of SEALide-based Traceable Linker 6 as Shown in Scheme S1

### 4-{2-([{(9H-fluoren-9-yl)methoxy}carbonyl]amino)-N-(2-[*tert*-butylsulfinothioyl]ethyl)acetamido}benzoic acid (S2)

To a stirred solution of trityl derivative **S1**<sup>S1</sup> (200 mg, 278  $\mu$ mol) in CH<sub>2</sub>Cl<sub>2</sub> (9.27 mL) were added *t*BuSH (156  $\mu$ L, 1.39 mmol) and I<sub>2</sub> (529 mg, 4.17 mmol) at room temperature, and the mixture was stirred at same temperature for 1 h. Then 0.5 M Na<sub>2</sub>S<sub>2</sub>O<sub>3</sub> aq. was added to the resulting mixture until its dark red color disappeared. The obtained mixture was extracted with EtOAc, and the combined organic layer was dried over MgSO<sub>4</sub> and concentrated in vacuo. The product was purified by column chromatography (CHCl<sub>3</sub>/MeOH = 100/0, 99/1, then 0/100 (v/v)) and 124 mg of **S2** (220  $\mu$ mol, 79%) was obtained as white amorphousness: <sup>1</sup>H NMR (CDCl<sub>3</sub>, 400 MHz)  $\delta$  = 1.29 (9H, s), 2.85 (2H, t, *J* = 7.5 Hz), 3.81 (2H, s), 4.05 (2H, t, *J* = 6.8 Hz), 4.20 (1H, t, *J* = 6.8 Hz), 4.35 (2H, d, *J* = 7.3 Hz), 5.89 (1H, s), 7.30 (2H, t, *J* = 7.6 Hz), 7.35 (2H, d, *J* = 8.4 Hz), 7.39 (2H, t, *J* = 7.5 Hz), 7.59 (2H, d, *J* = 7.5 Hz), 7.75 (2H, d, *J* = 7.4 Hz), 8.12 (2H, d, *J* = 8.4 Hz); <sup>13</sup>C NMR (CDCl<sub>3</sub>, 75 MHz)  $\delta$  = 30.0, 37.1, 43.8, 47.2, 48.2, 49.1, 67.6, 120.1, 125.3, 127.2, 127.9, 128.4, 132.2, 141.4, 143.9, 144.6, 156.7; HRMS (ESI-TOF) *m/z* calcd for C<sub>30</sub>H<sub>32</sub>N<sub>2</sub>NaO<sub>5</sub>S<sub>2</sub> ([M + Na]<sup>+</sup>) 587.1650, found 587.1631.

### Preparation of traceable linker 6 via peptide resin S3

**General Procedure:** The peptides were synthesized using Fmoc-based solid phase peptide synthesis (Fmoc SPPS). Building blocks were coupled on NovaSyn® TGR resin (0.22 mmol amine/g). Reagents and solvents are listed below. All coupling reactions were performed for 2 h. Fmoc-removal was achieved using 20% (v/v) piperidine in DMF (10 min).

| building block                                                                         | reagents                                        | solvent              |
|----------------------------------------------------------------------------------------|-------------------------------------------------|----------------------|
| <b>S2</b> (2 eq.)                                                                      | HATU (1.9 eq.), DIPEA (1.9 eq.)                 | DMF                  |
| (+)-biotin (5 eq.)                                                                     | DIC (5 eq.), HOBt·H <sub>2</sub> O (5 eq.)      | DMSO/DMF = 1/1 (v/v) |
| N <sub>3</sub> (CH <sub>2</sub> ) <sub>4</sub> CO <sub>2</sub> H <sup>S2</sup> (5 eq.) | DIC (5.3 eq.), Oxyma Pure <sup>S3</sup> (5 eq.) | DMF                  |
| Others (3 eq.)                                                                         | DIC (3.2 eq.), Oxima Pure (3 eq.)               | DMF                  |

Abbreviations. DIC: *N,N'*-diisopropylcarbodiimide; DIPEA: *N,N'*-diisopropylethylamine; HATU: 1-[bis(dimethylamino)methylene]-1*H*-1,2,3-triazolo[4,5-*b*]pyridinium 3-oxid hexafluorophosphate; HOBt: 1-hydroxybenzotriazole; Oxyma pure: ethyl cyanoglyoxylate-2-oxime.

For removal of an ivDde (1-(4,4-dimethyl-2,6-dioxocyclohex-1-ylidene)-3-methylbutyl) group, the peptide resin was treated with 2% (v/v) hydrazine hydrate in DMF (twice for 2 h followed by once overnight). Following to completion of the peptide elongation, the resin was subjected to global deprotection using TFA/triethylsilane/H<sub>2</sub>O (95:2.5:2.5 (v/v)) for 2 h at room temperature. After filtration of the resin and subsequent removal of TFA by N<sub>2</sub> flow, the obtained residue was neutralized by the addition of sat. NaHCO<sub>3</sub> aq. followed by solid NaHCO<sub>3</sub>. The obtained mixture was dissolved in 33% (v/v) AcOH aq., and then purified by a preparative HPLC.

**6:** A white lyophilized powder; 41% yield; Analytical HPLC conditions: 10 to 90%. Retention time = 18.2 min; Preparative HPLC conditions: 36 to 46%; LRMS (ESI-Ion Trap) *m/z* calcd for [M + H]<sup>+</sup> 1256.5, found 1256.7.

### Preparation of Traceable Linkers S8 and S9 and Negative Control Linker 7

Linkers **S8**, **S9** (Fig. S4) and **S10** (Scheme S3) were prepared as similar to traceable linker **6**. For preparation of negative control **7**, SEALide **S1** was employed instead of **S2**. Then, methyl iodide (15  $\mu$ L, 0.24 mmol) and DIPEA (15  $\mu$ L, 86  $\mu$ mol) were added to a solution of **S10** (3.5 mg, 3.0  $\mu$ mol) in DMF (3.4 mL). The resulting mixture was stirred at room temperature for 1 h, and the obtained solution was purified by preparative HPLC to yield linker **7** (0.67 mg, 19% yield).

**S8:** A white lyophilized powder; 25% yield; Analytical HPLC conditions: 10 to 90%. Retention time = 16.3 min; Preparative HPLC conditions: 32 to 42%; LRMS (ESI-Ion Trap) *m/z* calcd for [M + H]<sup>+</sup> 1401.7, found 1401.8.



**S9:** A white lyophilized powder; 36% yield; Analytical HPLC conditions: 10 to 90%. Retention time = 16.0 min; Preparative HPLC conditions: 31 to 41%; LRMS (ESI-Ion Trap)  $m/z$  calcd for  $[M + H]^+$  1836.9, found 1836.4.

**S10:** A white lyophilized powder; 24% yield; Analytical HPLC conditions: 10 to 90%. Retention time = 14.2 min; Preparative HPLC conditions: 25 to 35%; LRMS (ESI-Ion Trap)  $m/z$  calcd for  $[M + H]^+$  1168.5, found 1168.0.

**7:** A white lyophilized powder; Analytical HPLC conditions: 10 to 60%. Retention time = 18.9 min; Preparative HPLC conditions: 10 to 60%; LRMS (ESI-Ion Trap)  $m/z$  calcd for  $[M + H]^+$  1182.6, found 1182.6.

### **Click Chemistry of Traceable Linker 6 with Alkynylated Small Molecule S5 Followed by Linker Cleavage with Cysteine**

**Preparation of alkyne derivative S5:** To fluorescein isothiocyanate isomer-I (FITC) (70.1 mg, 180  $\mu$ mol) were added **S4**<sup>S4</sup> (50.0 mg, 216  $\mu$ mol) in THF/EtOH (2/3 (v/v), 10.5 mL) and triethylamine (30.2  $\mu$ L, 216  $\mu$ mol) at 0 °C, and the resulting mixture was stirred at room temperature for 1 h. After evaporation, the resulting residue was purified by column chromatography ( $\text{CHCl}_3/\text{MeOH}$  = 98/2, 97/3, 90/10, then 0/100 (v/v)) and 104 mg of **S5** (168  $\mu$ mol, 93%) was obtained as a yellow powder: <sup>1</sup>H NMR ( $\text{CD}_3\text{OD}$ , 400 MHz)  $\delta$  = 2.81 (1H, t,  $J$  = 2.5 Hz), 3.63-3.81 (16H, m), 4.14 (2H, d,  $J$  = 2.5 Hz), 6.58 (2H, dd,  $J$  = 2.5 Hz and 8.8 Hz), 6.71-6.73 (4H, m), 7.81 (2H, dd,  $J$  = 1.7 Hz and 8.3 Hz), 8.19 (2H, d,  $J$  = 1.8 Hz); <sup>13</sup>C NMR ( $\text{CD}_3\text{OD}$ , 75 MHz)  $\delta$  = 45.5, 59.0, 70.0, 70.1, 71.3, 71.43, 71.49, 71.54, 75.9, 80.6, 103.5, 112.1, 114.2, 126.1, 129.2, 130.6, 142.6, 154.7, 162.3, 170.8, 182.9; HRMS (ESI-TOF)  $m/z$  calcd for  $\text{C}_{32}\text{H}_{32}\text{N}_2\text{NaO}_9\text{S}$  ( $[M + \text{Na}]^+$ ) 643.1726, found 643.1706.

**Click Chemistry:** Traceable linker **6** in DMSO (6.0 mM, 66.6  $\mu$ L), alkyne **9** in PBS (1.25 mM, 400  $\mu$ L), tris[(1-benzyl-1H-1,2,3-triazol-4-yl)methyl]amine (TBTA)<sup>S5</sup> in 20% (v/v) DMSO/*t*BuOH (1.7 mM, 118  $\mu$ L),  $\text{CuSO}_4$  in water (50 mM, 40.0  $\mu$ L), sodium ascorbate in water (25 mM, 40.0  $\mu$ L), and PBS (416  $\mu$ L) were added to 1.00 mL of water (final concn.: 0.20 mM **6**, 0.25 mM **9**, 0.10 mM TBTA, 1.0 mM  $\text{CuSO}_4$ , 0.50 mM sodium ascorbate). After 1 h of the reaction at room temperature, reaction mixture was injected into a preparative HPLC to yield conjugate **S6**.

**S6:** A yellow lyophilized powder; 0.61 mg, 65% yield; Analytical HPLC conditions: 30 to 40%. Retention time = 25.5 min; Preparative HPLC conditions: 35 to 45%; LRMS (ESI-Ion Trap)  $m/z$  calcd for  $[M + 2H]^{2+}$  938.9, found 938.7.

**Linker Cleavage via NCL:** To sodium phosphate buffer (1.0 M, pH 7.5, 147.5  $\mu$ L) containing NP40 (1.0% (v/v)), TCEP-HCl (40 mM), MPAA (100 mM) and cysteine (5.0 mM) was added conjugate **5** in DMF (6.0 mM, 2.5  $\mu$ L, final concn. 0.10 mM). After incubation at 37 °C for 24 h under argon, completion of cleavage of the linker was confirmed using HPLC and the products were characterized by MS analyses.

**S7:** Analytical HPLC conditions: 25 to 35%. Retention time = 19.4 min; LRMS (ESI-Ion Trap)  $m/z$  calcd for  $[M + H]^+$  1069.4, found 1069.3.

### Preparation of Alkynylated BSA

Starting from a commercially available BSA (6.6 mg), the alkynylated BSA was prepared according to the literature.<sup>S6</sup> Briefly, *N*-(1-propynyl)maleimide was added to BSA in PBS (final concentration: 20  $\mu$ M BSA; 2 mM maleimide). After stirring for 12 h, the protein was purified by acetone precipitation and was dissolved in PBS with 0.1% SDS (1.32 mL) for the following experiments.

### SDS-PAGE Conditions

After addition of SDS-PAGE sample loading buffer followed by heating at 100 °C for 5 min, the reaction mixture was analyzed using SDS-PAGE in 10% polyacrylamide gels. For the chemiluminescence imaging of the biotinylated proteins, the proteins were transferred to Amersham Hybond-P PVDF Membrane (GE Healthcare) and detected with a SAV-HRP (GE Healthcare) and ECL plus Western Blotting Detection System (GE Healthcare). For visualization of all proteins, silver stain KANTO III (KANTO CHEMICAL CO., INC.) or Lumitein™ Protein Gel Stain (Nacalai Tesque) was employed.

### Introduction of Traceable Linker **6**, **S8**, **S9** or negative control **7** onto Alkynylated BSA

**Click Chemistry:** To a mixture of PBS (540  $\mu$ L) and water (437  $\mu$ L) were added the alkynylated BSA in PBS with 0.1% SDS (5.0 g/L, 200  $\mu$ L), traceable linker **6**, **S8**, **S9** or negative control linker **7** in DMSO (6.0 mM, 25.0  $\mu$ L), TBTA in 20% (v/v) DMSO/*t*BuOH (1.7 mM, 88.0  $\mu$ L), CuSO<sub>4</sub> aq. (50 mM, 30.0  $\mu$ L), sodium ascorbate aq. (50 mM, 30.0  $\mu$ L), and SDS aq. (10% (w/v), 150  $\mu$ L) (final concn.: 0.50 g/L alkynylated BSA, 0.10 mM **6**, **S8**, **S9** or **7**, 0.10 mM TBTA, 1.0 mM CuSO<sub>4</sub>, 1.0 mM sodium ascorbate, 1% (w/v) SDS). After the reaction at room temperature for 1 h, small molecules were removed by acetone precipitation.

### Adsorption on Streptavidin Beads Followed by Elution of BSA Conjugate

**Adsorption on Streptavidin Beads:** After the click chemistry, Pierce® Streptavidin UltraLink® Resin (50  $\mu$ L, Thermo SCIENTIFIC) was added to the reaction mixture containing ca. 100  $\mu$ g BSA

and its derivatives in PBS with 0.1% SDS (200  $\mu$ L). After the adsorption at room temperature for 1 h, the resulting resin was washed with 0.1% SDS in PBS five times and it was subjected to subsequent reactions.

**Elution of BSA Conjugate by Linker Cleavage:** To the resulting streptavidin beads was added FTC-derivative **8** (10 mM, 2.0  $\mu$ L, final concn. 0.10 mM) in sodium phosphate buffer (0.40 M, pH 7.4, 198  $\mu$ L) containing SDS (0.1%), Gn-HCl (6.0 M), TCEP-HCl (40 mM) and MPAA (50 mM). The reaction was conducted at 37 °C for 24 h under argon. After centrifugation of the resulting mixture (2000 rpm, 2 min), supernatant was collected and the precipitate was suspended in 100  $\mu$ L PBS with 0.1% SDS. The suspension was subjected to centrifugation (2000 rpm, 2 min) again and the obtained supernatant was combined with the first one.

**Elution of Proteins Remaining on Streptavidin Beads by Denaturation:** The resin obtained after the linker cleavage as mentioned above was suspended in 2  $\times$  SDS-PAGE sample loading buffer (25  $\mu$ L) and water (25  $\mu$ L), and the mixture was heated at 100 °C for 5 min. After centrifugation as mentioned in the section “Elution of BSA Conjugate by Linker Cleavage”, the combined supernatant was concentrated by ultrafiltration (Amicon® Ultra-0.5, Ultracel-10 Membrane, 10 kDa, Merk Millipore, 14000  $\times$  g, 15 min) and analyzed using SDS-PAGE.

**Structural Analysis of Eluted Target:** In this experiment, **S6** was employed instead of the BSA-traceable linker conjugate. Adsorption of **S6** on streptavidin beads was performed as mentioned above (5.34  $\mu$ L **S6** (3 mM in DMSO) , 20  $\mu$ L beads and 200  $\mu$ L PBS). Then the beads were treated with 100  $\mu$ M cysteine, 50 mM MPAA, 40 mM TCEP and 0.1% SDS in 400 mM Na phosphate buffer (pH 7.4) at 37 °C for 24 h. Then the eluent was analysed by HPLC. Analytical HPLC conditions: 25 to 35%. Retention time of **S7**= 22.4 min; LRMS (ESI-Ion Trap)  $m/z$  calcd for  $[M + 2H]^+$  535.2, found 535.2.

### **Enrichment and Selective Labelling of BSA in Protein Mixture**

**Preparation of the protein mixture:** A lysate of red blood cells (BIZCOM JAPAN) in PBS was prepared according to a protocol on vender's website.<sup>S7</sup> To the lysate (1.1 mL) was added the alkynylated BSA in PBS with 0.1% SDS (20  $\mu$ L) and the obtained mixture was used for the following experiments. For preparation of a lysate of HCT116 cells, HCT116 cells were cultured in DMEM (Dulbecco's modified Eagle medium) containing 10% fetal bovine serum and antibiotics (100 U/mL penicillin G and 100  $\mu$ g/mL streptomycin) at 37 °C in a humidified incubator continuously flushed with a mixture of 5% CO<sub>2</sub>-95% air. The cells were washed twice with cold PBS, harvested, and then sonicated in HEPES buffered saline (HBS). The cell extracts were

centrifuged at  $20,000 \times g$  for 10 min at 4 °C. Protein concentration of resultant supernatants was determined with a DC protein assay kit (Bio-Rad) with BSA as the standard. To the obtained protein mixture (4.26 mg/mL, 100  $\mu$ L) was added the alkynylated BSA in PBS with 0.1% SDS (2.6  $\mu$ L) and the obtained mixture was used for following experiments.

**Click Chemistry in the Red Blood Cell Lysate:** To the alkynylated BSA in the red blood cell lysate (1.12 mL) were added traceable linker **6** in DMSO (6.0 mM, 25  $\mu$ L), TBTA in 20% (v/v) DMSO/*t*BuOH (1.7 mM, 88  $\mu$ L), CuSO<sub>4</sub> aq. (50 mM, 30  $\mu$ L), sodium ascorbate aq. (50 mM, 30  $\mu$ L), SDS aq. (10% (w/v), 150  $\mu$ L) and PBS (57  $\mu$ L) (final concn.: 0.10 mM **6**, 0.10 mM TBTA, 1.0 mM CuSO<sub>4</sub>, 1.0 mM sodium ascorbate, 1% (w/v) SDS). Following to reaction at room temperature for 1 h, the reagents were removed by acetone precipitation. Then, the obtained precipitate was dissolved in 0.1% SDS in PBS (1.2 mL) for the following experiments.

**Click Chemistry in the Lysate of HCT116 Cells:** To the alkynylated BSA in the lysate of HCT116 cells (102.6  $\mu$ L) were added traceable linker **6** in DMSO (6.0 mM, 3.3  $\mu$ L), TBTA in 20% (v/v) DMSO/*t*BuOH (1.7 mM, 11.6  $\mu$ L), CuSO<sub>4</sub> aq. (50 mM, 4.0  $\mu$ L), sodium ascorbate aq. (50 mM, 4.0  $\mu$ L), SDS aq. (10% (w/v), 19.8  $\mu$ L) and PBS (52.7  $\mu$ L) (final concn.: 0.10 mM **6**, 0.10 mM TBTA, 1.0 mM CuSO<sub>4</sub>, 1.0 mM sodium ascorbate, 1% (w/v) SDS). Following to reaction at room temperature for 1 h, the reagents were removed by acetone precipitation. Then, the obtained precipitate was dissolved in 0.1% SDS in PBS (600  $\mu$ L) for the following experiments.

**Adsorption on Streptavidin Beads Followed by Cleavage:** It was performed as similar to that described in a section “Adsorption on Streptavidin Beads Followed by Elution of BSA Conjugate”.

**Enrichment without Linker Cleavage as Similar to Conventional Linkers:** After adsorption of the protein mixture on streptavidin beads, the proteins on the beads were eluted and analyzed as mentioned in a section “Elution of Proteins Remaining on Streptavidin Beads”.

## References

- S1 S. Tsuda, A. Shigenaga, K. Bando, A. Otaka, *Org. Lett.* **2009**, *11*, 823–826.
- S2 W. Shi, S. Dolai, S. Averick, S. S. Fernando, J. A. Saltos, W. L’Amoreaux, P. Banerjee, K. Raja, *Bioconjugate Chem.* **2009**, *20*, 1595–1601.
- S3 R. Subiros-Funosas, S. N. Khattab, L. Nieto-Rodriguez, A. El-Faham, F. Albericio, *Aldrichimica Acta* **2013**, *46*, 21–40.
- S4 R. P. Murelli, A. X. Zhang, J. Michel, W. L. Jorgensen, D. A. Spiegel, *J. Am. Chem. Soc.* **2009**, *131*, 17090–17092.

- S5 a) K. Asano, S. Matsubara, *Org. Lett.* **2010**, *12*, 4988–4991; b) T. R. Chan, R. Hilgraf, K. B. Sharpless, V. V. Fokin, *Org. Lett.* **2004**, *6*, 2853–2855.
- S6 S. Lee, W. Wang, Y. Lee, N. S. Sampson, *Org. Biomol. Chem.* **2015**, *13*, 8445-8452.
- S7 A lysate of red blood cells was prepared using sonication according to a vendor's protocol. See, "[http://www.gelifesciences.co.jp/technologies/protein\\_preparation/lysis.html](http://www.gelifesciences.co.jp/technologies/protein_preparation/lysis.html)" (accessed December 6, 2014).
